# Supplementary material for: The design and synthesis of two imidazole fluorescent probes for the special recognition of HClO/NaHSO3 and their applications
Source: Royal Society of Chemistry journal article supplement (doi:10.1039/d0ay00334d), 2020-01-01
Supplement: d0ay00334d1.pdf [file d0ay00334d1.pdf]

## Supplementary Material

### Design and synthesis of two imidazole fluorescent probes for special recognition of HClO/NaHSO<sub>3</sub> and their applications

Hong-Lin Ding, Yan-Qing Pu, Da-Ying Ye, Zi-Yue Dong, Man Yang, Cheng-Wei Lü,\* Yue An\*

*College of Chemistry and Chemical Engineering, Liaoning Normal University, Huanghe  
Road 850#, Dalian 116029, P.R. China*

## Supplementary Index

|                                     |   |
|-------------------------------------|---|
| 1. <sup>1</sup> H NMR .....         | 2 |
| 2. <sup>13</sup> C NMR .....        | 4 |
| 3. UV Absorption Spectroscopy ..... | 5 |
| 4. Fluorescence Spectroscopy .....  | 6 |

# 1. $^1\text{H}$ NMR

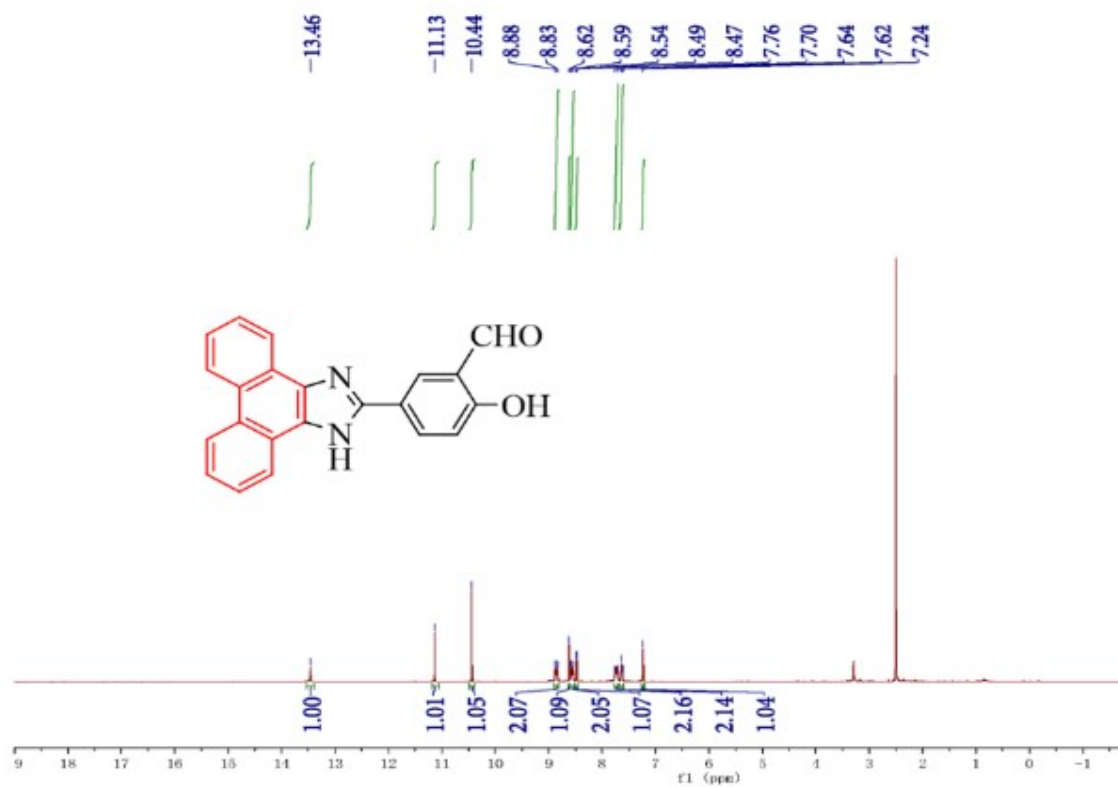

Fig. S1  $^1\text{H}$  NMR spectrum of compound L1

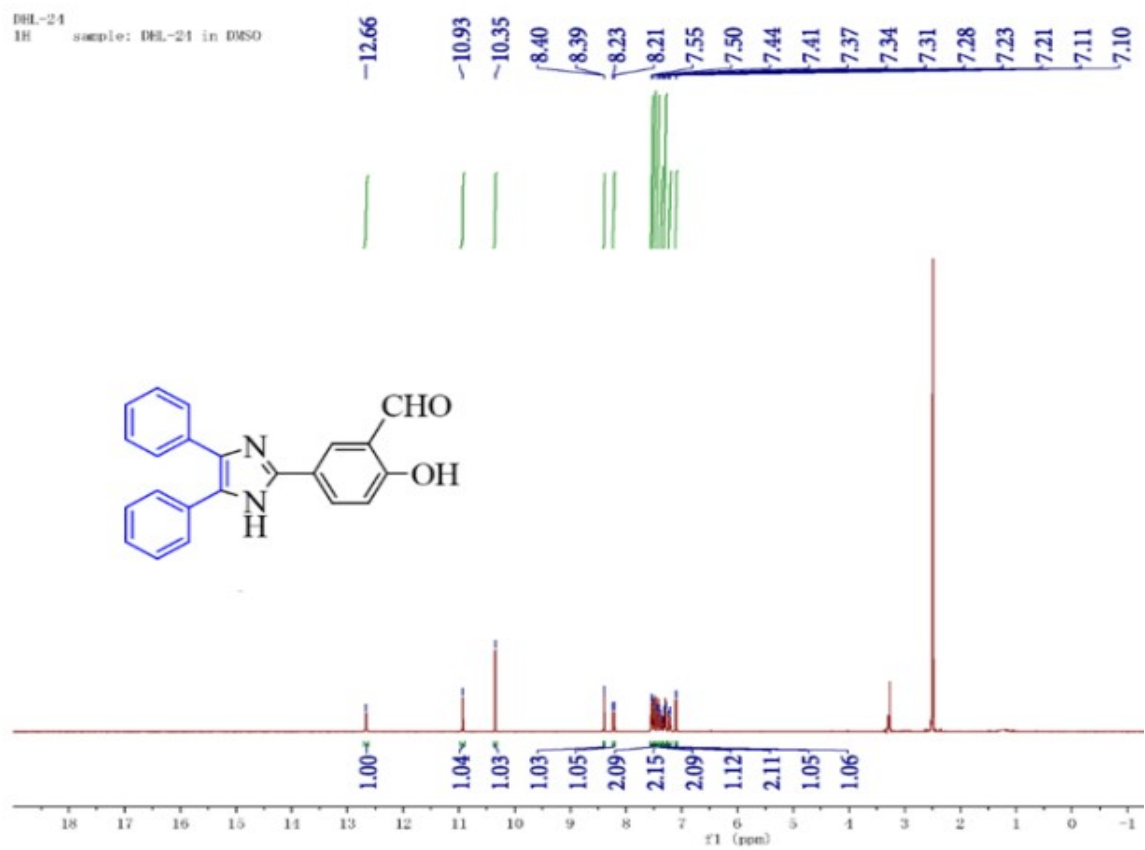

**Fig. S2** <sup>1</sup>H NMR spectrum of compound L2

## 2. $^{13}\text{C}$ NMR

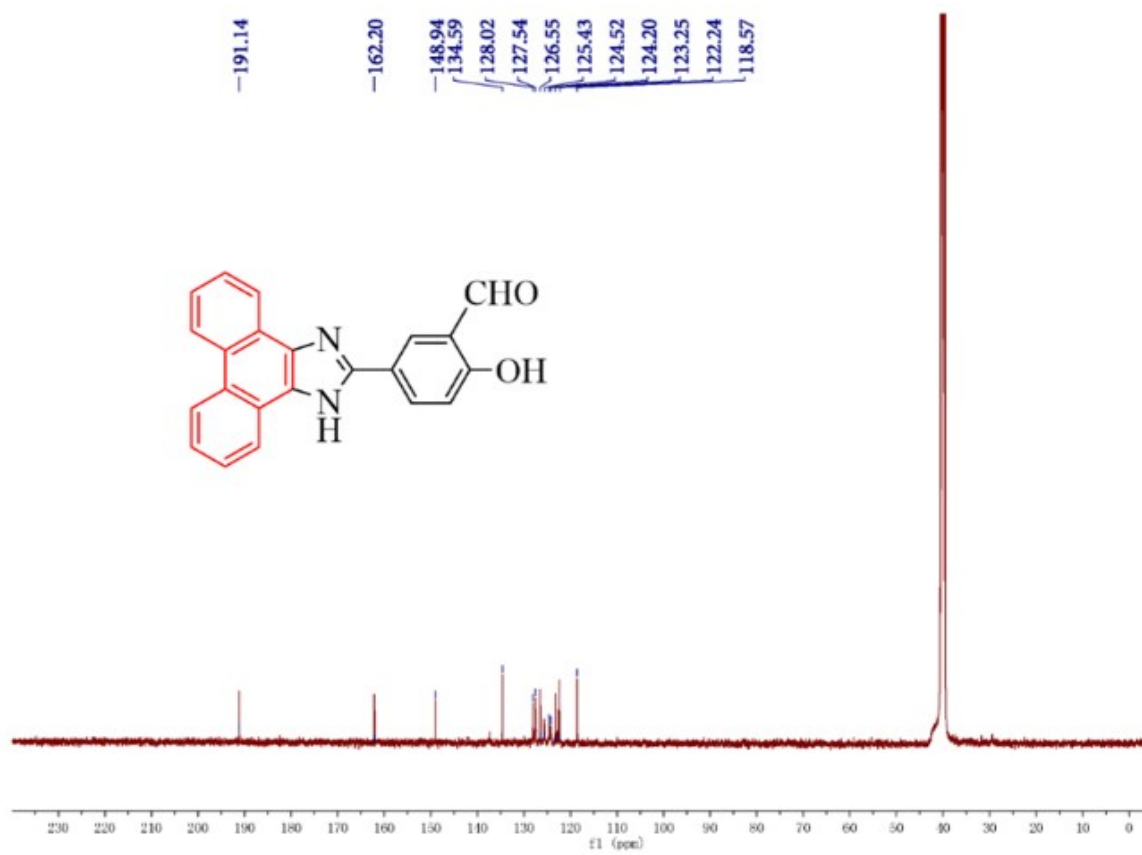

**Fig. S3**  $^{13}\text{C}$  NMR spectrum of compound **L1**

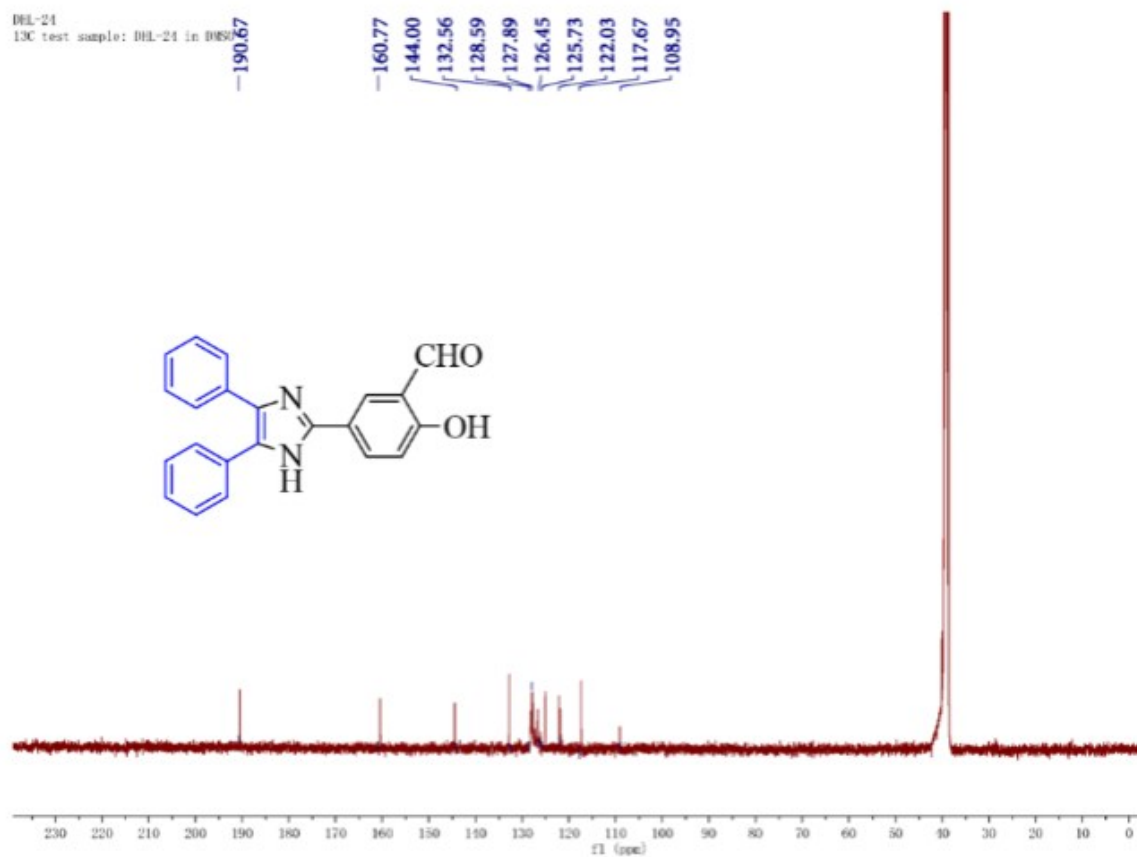

**Fig. S4** <sup>13</sup>C NMR spectrum of compound L<sub>2</sub>

### 3. UV Absorption Spectroscopy

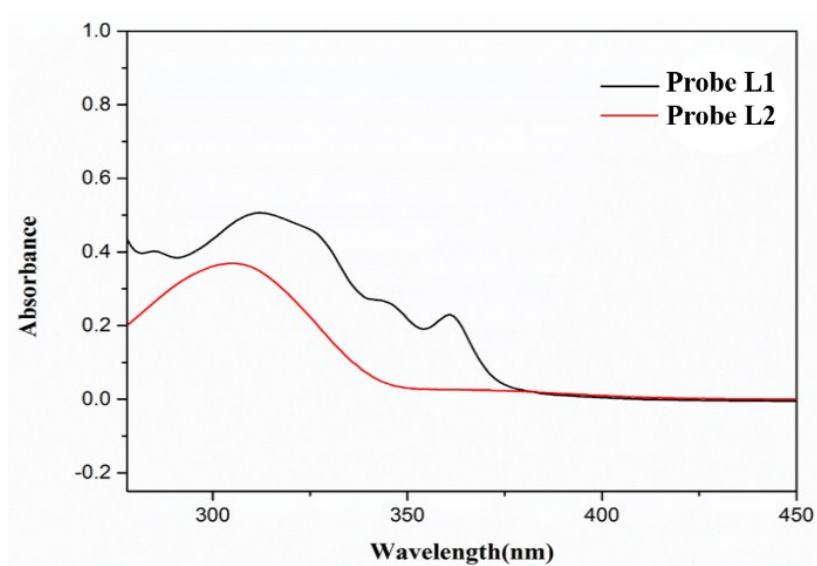

**Fig. S5** UV absorption spectroscopy compound L<sub>1</sub>, L<sub>2</sub> dispersed in PBS buffer (1.0 mM, pH = 7.4, 1% DMF)

## 4. Fluorescence Spectroscopy

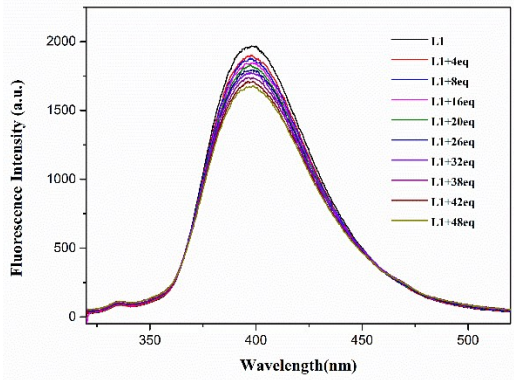

(a)

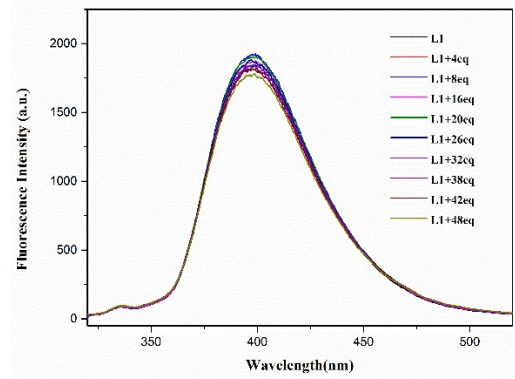

(e)

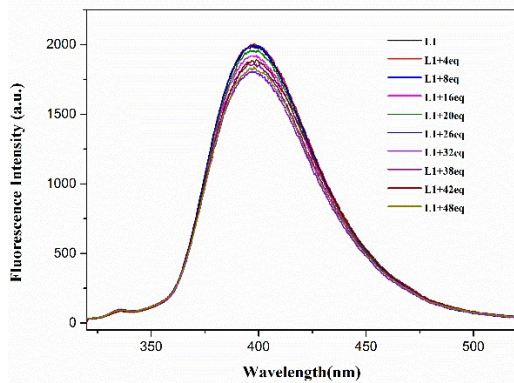

(b)

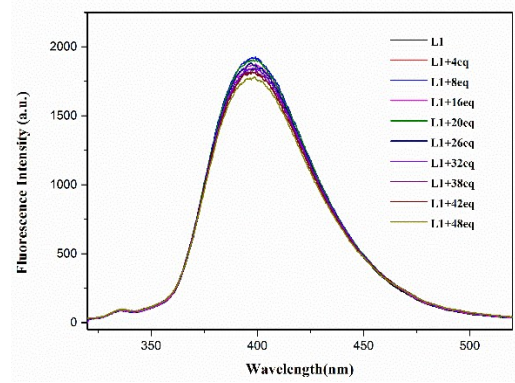

(f)

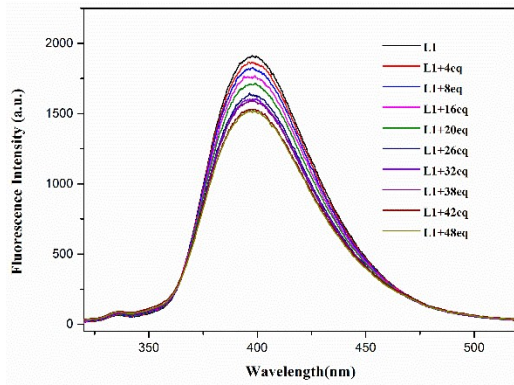

(c)

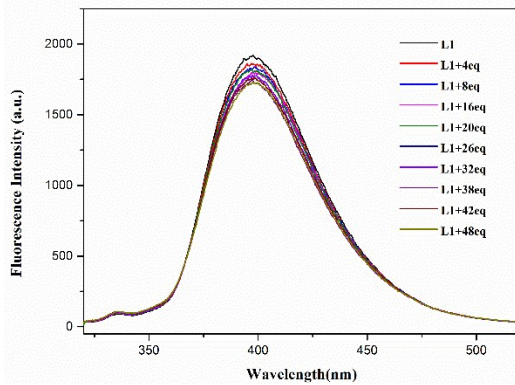

(g)

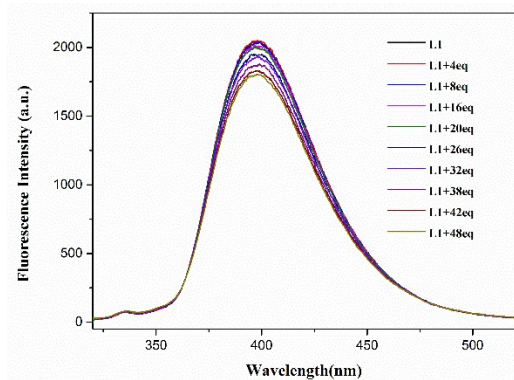

(d)

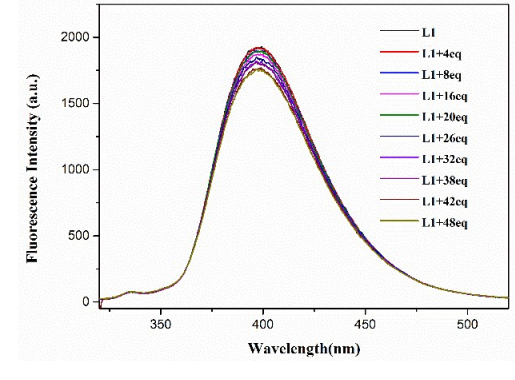

(h)



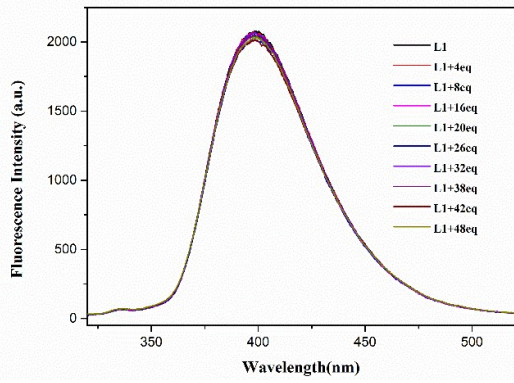

(i)

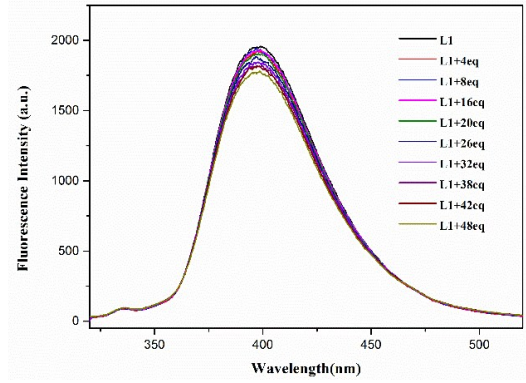

(m)

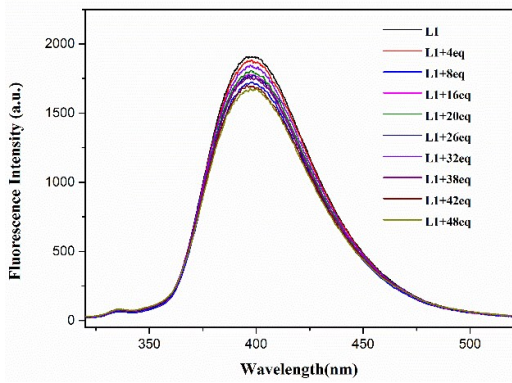

(j)

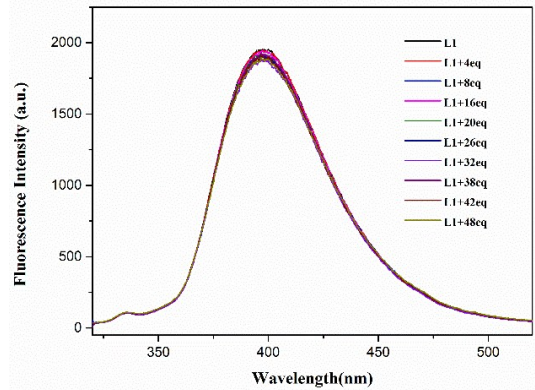

(n)

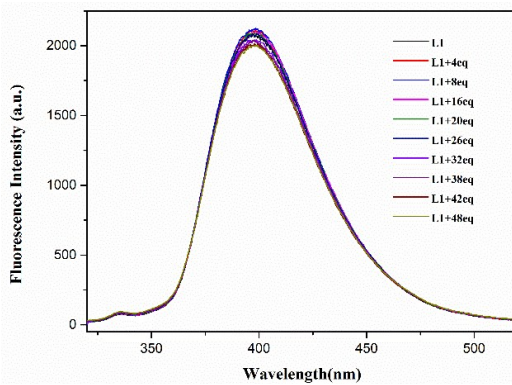

(k)

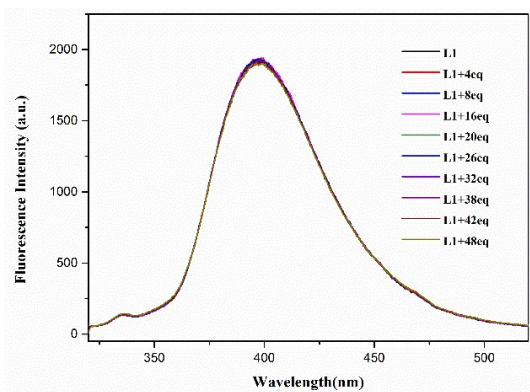

(o)

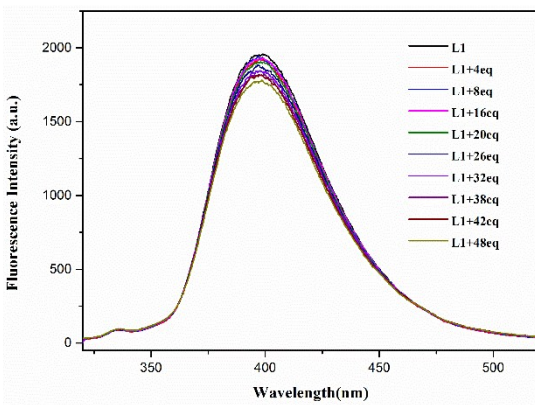

(l)

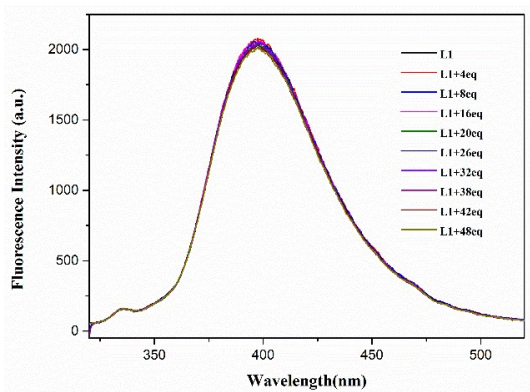

(p)

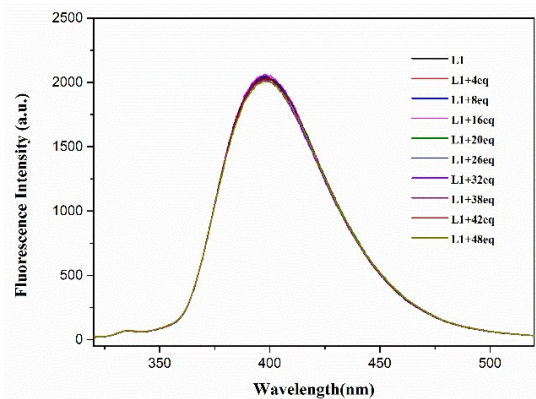

(q)

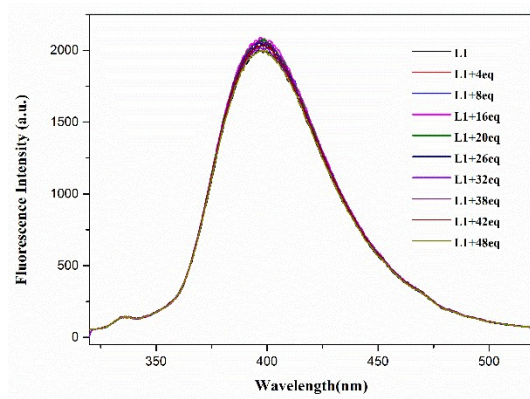

(u)

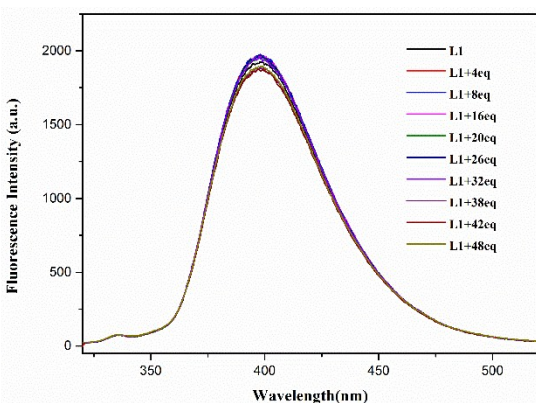

(r)

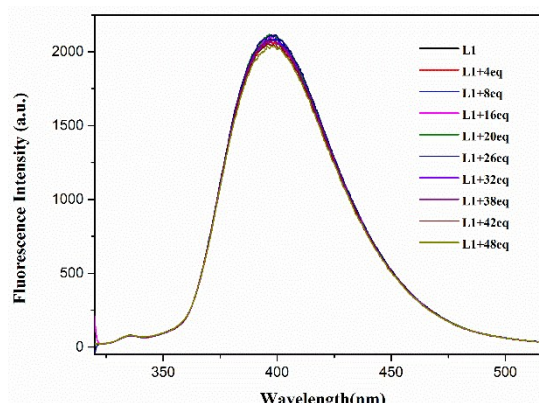

(v)

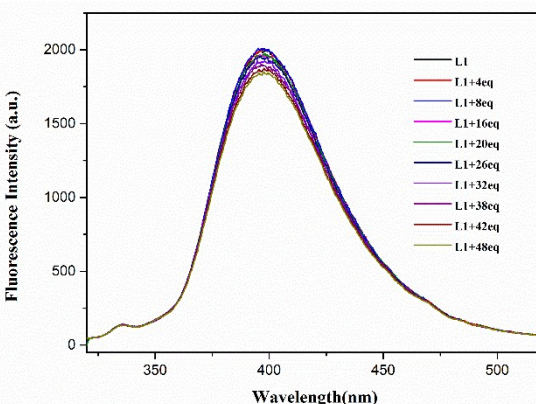

(s)

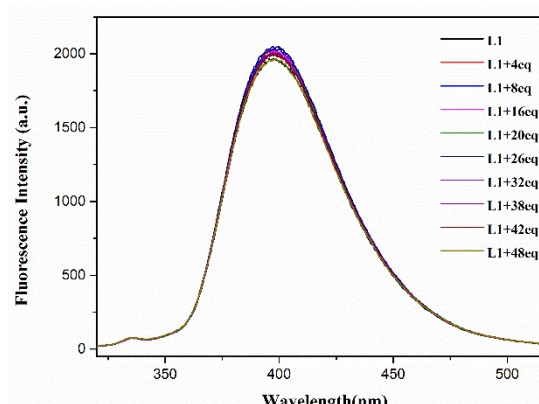

(w)

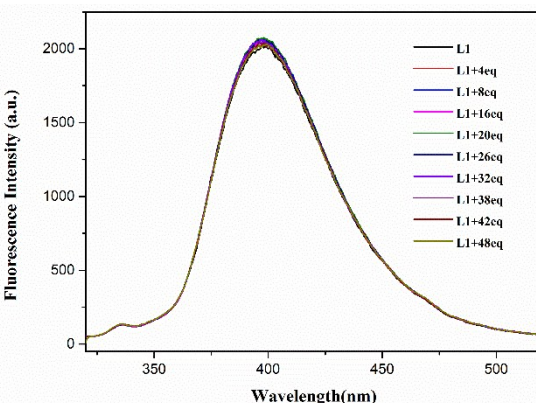

(t)

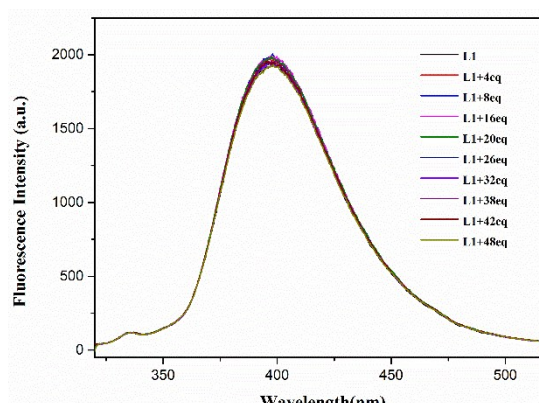

(x)



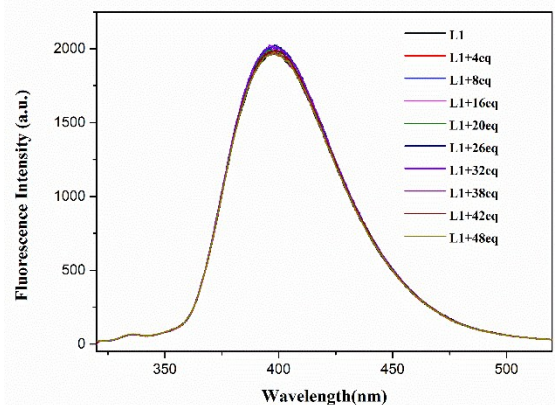

(y)

**Fig. S6** Fluorescence quenching of sensor **L1** dispersed in PBS buffer (1.0 mM, pH = 7.4, 1% DMF) after the addition of different analytes: **(a)**  $Zn^{2+}$ , **(b)**  $Fe^{2+}$ , **(c)**  $F^-$ , **(d)**  $HPO_4^{2-}$ , **(e)**  $NO_3^-$ , **(f)**  $K^+$ , **(g)**  $ONOO^-$ , **(h)**  $CO_3^{2-}$ , **(i)**  $SO_4^{2-}$ , **(j)** Hcy, **(k)**  $H_2PO_4^-$ , **(l)**  $Na^+$ , **(m)**  $Cl^-$ , **(n)**  $SO_3^{2-}$ , **(o)** TBHP, **(p)** GSH, **(q)** Cys, **(r)**  $NO_2^-$ , **(s)**  $SCN^-$ , **(t)**  $\cdot OH$  **(u)**  $^1O_2$ , **(v)**  $HSO_3^-$ , **(w)**  $H_2O_2$ , **(x)**  $ClO_4^-$ , **(y)**  $HCO_3^-$
